# Supplementary material
Source: HighWire-hosted journal article supplement (https://jitc.bmj.com/content/10/12/e005447)
Supplement: inline-supplementary-material-3 [file inline-supplementary-material-3.pdf]

|               | <b>Forward Primer</b>   | <b>Reverse Primer</b>    |
|---------------|-------------------------|--------------------------|
| <i>Ii6</i>    | TAGTCCTTCCTACCCCAATTTCC | TTGGTCCTTAGCCACTCCTTC    |
| <i>Nos2</i>   | GTTCTCAGCCCAACAATACAAGA | GTGGACGGGTCGATGTCAC      |
| <i>Tnfa</i>   | CCCTCACACTCAGATCATCTTCT | GCTACGACGTGGGCTACAG      |
| <i>β2m</i>    | TTCTGGTGCTTGTCTCACTGA   | CAGTATGTTTCGGCTTCCCATTTC |
| <i>H2-Aa</i>  | TCAGTCGCAGACGGTGTTTAT   | GGGGGCTGGAATCTCAGGT      |
| <i>Tgfb1</i>  | CTCCCGTGGCTTCTAGTGC     | GCCTTAGTTTGGACAGGATCTG   |
| <i>Argl</i>   | CTCCAAGCCAAAGTCCTTAGAG  | AGGAGCTGTCATTAGGGACATC   |
| <i>Ccl2</i>   | TTAAAAACCTGGATCGGAACCAA | GCATTAGCTTCAGATTTACGGGT  |
| <i>Indo</i>   | GCTTTGCTCTACCACATCCAC   | CAGGCGCTGTAACCTGTGT      |
| <i>Ccl3</i>   | TTCTCTGTACCATGACACTCTGC | CGTGGAATCTTCCGGCTGTAG    |
| <i>Ccl5</i>   | GCTGCTTTGCCTACCTCTCC    | TCGAGTGACAAACACGACTGC    |
| <i>Cxcl9</i>  | TCCTTTTGGGCATCATCTTCC   | TTTGTAGTGGATCGTGCCTCG    |
| <i>Cxcl10</i> | CCAAGTGCTGCCGTCATTTTC   | GGCTCGCAGGGATGATTTCAA    |
| <i>Prf1</i>   | AGCACAAGTTCGTGCCAGG     | GCGTCTCTCATTAGGGAGTTTTT  |
| <i>Gzmb</i>   | CCACTCTCGACCCTACATGG    | GGCCCCCAAAGTGACATTTATT   |
| <i>Ifng</i>   | ATGAACGCTACACACTGCATC   | CCATCCTTTTGCCAGTTTCTC    |
| <i>Ctla-4</i> | GCTTCCTAGATTACCCCTTCTGC | CGGGCATGGTTCTGGATCA      |
| <i>Pdl-1</i>  | GCTCCAAAGGACTTGTACGTG   | TGATCTGAAGGGCAGCATTTC    |
| <i>Gapdh</i>  | AGGTCGGTGTGAACGGATTTG   | TGTAGACCATGTAGTTGAGGTCA  |
